# Supplementary material for: Deployment and evaluation of an NH 4 + ∕ H 3 O + reagent ion switching chemical ionization mass spectrometer for the detection of reduced and oxygenated gas-phase organic compounds
Source: Copernicus journal article supplement (doi:10.5194/amt-18-17-2025), 2025-01-06
Supplement: Supplementary file 1 [file amt-18-17-2025-supplement.pdf]

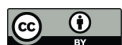

*Supplement of*

## **Deployment and evaluation of an $\text{NH}_4^+$ / $\text{H}_3\text{O}^+$ reagent ion switching chemical ionization mass spectrometer for the detection of reduced and oxygenated gas-phase organic compounds**

**Cort L. Zang and Megan D. Willis**

*Correspondence to:* Megan D. Willis ([megan.willis@colostate.edu](mailto:megan.willis@colostate.edu))

The copyright of individual parts of the supplement might differ from the article licence.

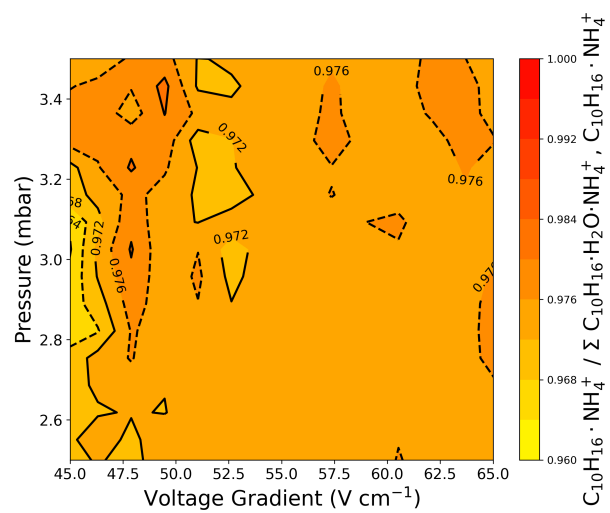

**Figure S1.** Contribution of the  $\alpha$ -pinene water cluster ( $\text{C}_{10}\text{H}_{16} \cdot \text{H}_2\text{O} \cdot \text{NH}_4^+$ ) to the sum of the water cluster and molecular ion with  $\text{NH}_4^+$ .

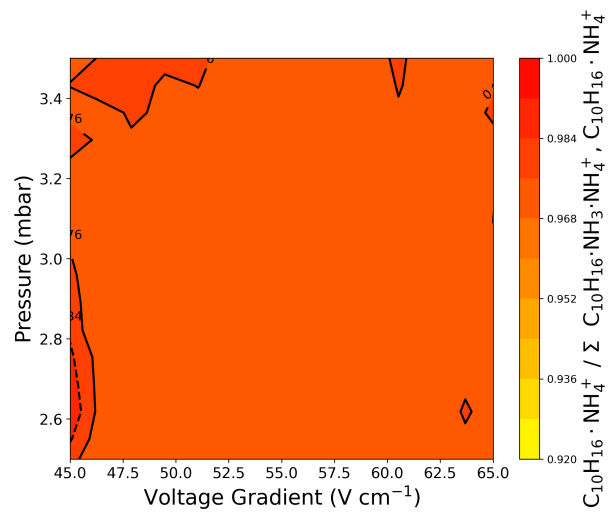

**Figure S2.** Contribution of the  $\alpha$ -pinene ammonia cluster ( $C_{10}H_{16} \cdot NH_3 \cdot NH_4^+$ ) to the sum of the ammonia cluster and molecular ion with  $NH_4^+$ .

**Table S1.** Table of instrument voltage settings for different experiments.

| Voltage Name     | NH <sub>4</sub> <sup>+</sup> | H <sub>3</sub> O <sup>+</sup> | NH <sub>4</sub> <sup>+</sup> | H <sub>3</sub> O <sup>+</sup> |
|------------------|------------------------------|-------------------------------|------------------------------|-------------------------------|
| Sections         | 2.2, 2.4, 2.5                | 2.2, 2.4, 2.5                 | 2.3, 2.6                     | 2.3, 2.6                      |
| fIMR Pressure    | 3.1 mbar                     | 2.5 mbar                      | 3.1 mbar                     | 2.2 mbar                      |
| fIMR Temperature | 60.0 C                       | 60.0 C                        | 60.0 C                       | 60.0 C                        |
| fIMR Front       | 650.0                        | 650.0                         | 600.0                        | 675.0                         |
| fIMR Back        | 0.0                          | 30.0                          | 0.0                          | 50.0                          |
| fIMR Amplitude   | 450.0                        | 450.0                         | 500.0                        | 500.0                         |
| fIMR Frequency   | 1.3 MHz                      | 1.3 MHz                       | 1.6 MHz                      | 1.6 MHz                       |
| Skimmer 1        | -4.9                         | -4.7                          | -6.0                         | -5.9                          |
| BSQ Front        | -10.2                        | -10.2                         | -10.7                        | -9.7                          |
| BSQ Back         | -11.4                        | -12.7                         | -11.9                        | -13.9                         |
| BSQ Amplitude    | 250.0                        | 350.0                         | 250.0                        | 270.0                         |
| BSQ Frequency    | 2.2 MHz                      | 2.2 MHz                       | 2.2 MHz                      | 2.2 MHz                       |
| Skimmer 2        | <i>See Trans A/B</i>         | <i>See Trans A/B</i>          | <i>See Trans A/B</i>         | <i>See Trans A/B</i>          |
| Trans A          | -10.8                        | -11.0                         | -10.8                        | -11.0                         |
| Trans B          | -13.0                        | -13.0                         | -13.0                        | -13.0                         |
| Ion Lens 2       | -74.3                        | -62.6                         | -71.8                        | -69.8                         |
| Deflector Flange | -93.1                        | -95.9                         | -97.9                        | -93.7                         |
| Deflector        | -103.2                       | -107.3                        | -106.4                       | -103.9                        |
| Reference        | -140.0                       | -110.1                        | -148.0                       | -136.0                        |

Values in table are reported in volts unless otherwise noted.

**Table S2.** Standardized gas cylinders and the composition.

| Tank 1 Component       | Conc. (ppb) | Tank 2 Component     | Conc. (ppb) | Tank 3 Component    | Conc. (ppb) |
|------------------------|-------------|----------------------|-------------|---------------------|-------------|
| Methane thiol          | 986         | Acetonitrile         | 1012        | Acetaldehyde        | 1003        |
| Isoprene               | 1005        | Dimethyl sulfide     | 998         | Acetone             | 1058        |
| Hydroxyacetone         | 984         | Methyl Vinyl Ketone  | 1046        | Methyl Ethyl Ketone | 1050        |
| Dimethyl sulfoxide     | 992         | Benzene              | 1023        | Toluene             | 1009        |
| trans-2-hexenal        | 967         | 1-Methoxy-2-propanol | 1090        | trans-3-hexenol     | 990         |
| Phenol                 | 471         | 3-Hexanone           | 980         | 2-Octanone          | 975         |
| 1,3,5-Trimethylbenzene | 991         | Limonene             | 981         | Camphor             | 980         |
| beta-Cylcocitral       | 916         | beta-Ionone          | 327         | D5-Siloxane         | 937         |

**Table S3.** Table of  $\text{NH}_4^+$  and  $\text{H}^+$  affinities obtained from the NIST Chemistry WebBook (Edward P. Hunter and Sharon G. Lias; Michael M. Meot-Ner (Mautner) and Sharon G. Lias).

| Compound               | $\text{NH}_4^+$ Affinity<br>[kJ mol <sup>-1</sup> ] | $\text{H}^+$ Affinity<br>[kJ mol <sup>-1</sup> ] |
|------------------------|-----------------------------------------------------|--------------------------------------------------|
| Ethylene               | 42                                                  | 681                                              |
| Acetone                | 118                                                 | 812                                              |
| Methylal               | 122                                                 | <i>no data</i>                                   |
| 2-Methyl-propene       | 146                                                 | 802                                              |
| 1,2-Dimethoxy-ethane   | 160                                                 | 858                                              |
| Benzene                | 81                                                  | 750                                              |
| Cyclohexane            | 40                                                  | 687                                              |
| 1,3,5-Trimethylbenzene | 91                                                  | 836                                              |
| Hydrogen sulfide       | 48                                                  | 705                                              |
| Water                  | 86                                                  | 691                                              |
| Ammonia                | 107                                                 | 854                                              |

**Table S4.** Vapor pressure estimates of certified gas standard analytes at 25°C.<sup>a</sup>

| Analyte                | Formula                                                        | Vapor Pressure<br>$\mu\text{g m}^{-3}$ | Vapor Pressure<br>Pa | Method                             |
|------------------------|----------------------------------------------------------------|----------------------------------------|----------------------|------------------------------------|
| dimethyl sulfide       | C <sub>2</sub> H <sub>6</sub> S                                | 1.60E+9                                | 6.38E+4              | Mean VP of Antoine & Grain methods |
| methane thiol          | CH <sub>4</sub> S                                              | 3.92E+9                                | 2.02E+5              | Mean VP of Antoine & Grain methods |
| dimethyl sulfoxide     | C <sub>2</sub> H <sub>6</sub> SO                               | 2.61E+6                                | 82.9                 | Mean VP of Antoine & Grain methods |
| benzene                | C <sub>6</sub> H <sub>6</sub>                                  | 3.66E+8                                | 1.16E+4              | Mean VP of Antoine & Grain methods |
| toluene                | C <sub>7</sub> H <sub>8</sub>                                  | 1.17E+8                                | 3.16E+3              | Mean VP of Antoine & Grain methods |
| 1,3,5-trimethylbenzene | C <sub>9</sub> H <sub>12</sub>                                 | 1.30E+7                                | 268                  | Mean VP of Antoine & Grain methods |
| phenol                 | C <sub>6</sub> H <sub>6</sub> O                                | 1.63E+6                                | 43                   | Modified Grain method              |
| isoprene               | C <sub>5</sub> H <sub>8</sub>                                  | 2.02E+9                                | 7.35E+4              | Mean VP of Antoine & Grain methods |
| limonene               | C <sub>10</sub> H <sub>16</sub>                                | 1.06E+7                                | 193                  | Mean VP of Antoine & Grain methods |
| acetone                | C <sub>3</sub> H <sub>6</sub> O                                | 7.78E+8                                | 3.32E+4              | Mean VP of Antoine & Grain methods |
| hydroxyacetone         | C <sub>3</sub> H <sub>6</sub> O <sub>2</sub>                   | 6.93E+6                                | 232                  | Mean VP of Antoine & Grain methods |
| methyl ethyl ketone    | C <sub>4</sub> H <sub>8</sub> O                                | 3.81E+8                                | 1.31E+4              | Mean VP of Antoine & Grain methods |
| methyl vinyl ketone    | C <sub>4</sub> H <sub>6</sub> O                                | 3.45E+8                                | 1.22E+4              | Mean VP of Antoine & Grain methods |
| 3-hexanone             | C <sub>6</sub> H <sub>12</sub> O                               | 8.73E+7                                | 2.16E+3              | Mean VP of Antoine & Grain methods |
| 2-octanone             | C <sub>8</sub> H <sub>16</sub> O                               | 1.27E+7                                | 246                  | Mean VP of Antoine & Grain methods |
| camphor                | C <sub>10</sub> H <sub>16</sub> O                              | 8.72E+4                                | 1.42                 | Modified Grain method              |
| acetaldehyde           | C <sub>2</sub> H <sub>4</sub> O                                | 2.15E+9                                | 1.21E+5              | Mean VP of Antoine & Grain methods |
| trans-2-hexenal        | C <sub>6</sub> H <sub>10</sub> O                               | 2.49E+7                                | 629                  | Mean VP of Antoine & Grain methods |
| beta-cyclocitral       | C <sub>10</sub> H <sub>16</sub> O                              | 1.48E+6                                | 24.1                 | Mean VP of Antoine & Grain methods |
| trans-3-hexenol        | C <sub>6</sub> H <sub>12</sub> O                               | 5.05E+6                                | 125                  | Mean VP of Antoine & Grain methods |
| acetonitrile           | C <sub>2</sub> H <sub>3</sub> N                                | 4.42E+8                                | 2.67E+4              | Mean VP of Antoine & Grain methods |
| 1-methoxy-2-propanol   | C <sub>4</sub> H <sub>10</sub> O <sub>2</sub>                  | 3.58E+7                                | 984                  | Mean VP of Antoine & Grain methods |
| D5-Siloxane            | C <sub>10</sub> H <sub>30</sub> O <sub>5</sub> Si <sub>5</sub> | 4.35E+6                                | 29.1                 | Mean VP of Antoine & Grain methods |

<sup>a</sup> Estimated using EPI Suite (US EPA).

**Table S5.** Comparison of sensitivities with  $\text{NH}_4^+$  ionization calculated in this study with those reported by Xu et al. (2022).<sup>a</sup>

| Analyte               | This Study<br>counts $\text{s}^{-1}$ ppt <sub>v</sub> <sup>-1</sup> | Xu et al. (2022)<br>counts $\text{s}^{-1}$ ppt <sub>v</sub> <sup>-1</sup> |
|-----------------------|---------------------------------------------------------------------|---------------------------------------------------------------------------|
| Acetonitrile          | 0.85                                                                | 0.55                                                                      |
| Acetaldehyde          | <0.1                                                                | 0.021                                                                     |
| Acetone               | 0.98                                                                | 1.2                                                                       |
| Isoprene              | <0.1                                                                | 0.028                                                                     |
| Methyl vinyl ketone   | 1.5                                                                 | 1.5                                                                       |
| Methyl ethyl ketone   | 1.3                                                                 | 1.6                                                                       |
| Hydroxyacetone        | 1.6                                                                 | 2.1                                                                       |
| Benzene               | <0.1                                                                | <0.001                                                                    |
| Phenol                | <0.1                                                                | 0.19                                                                      |
| Hexanone <sup>b</sup> | 3.4                                                                 | 3.8                                                                       |
| Trimethylbenzene      | <0.1                                                                | <0.001                                                                    |

<sup>a</sup> We are using a Vocus-S and Xu et al. (2022) report using a Vocus-2R which have different time-of-flight region lengths. The instruments also differ in extraction frequency (i.e., 25 kHz here, and 17.5 kHz for Xu et al. (2022)).

<sup>b</sup> This study used 3-Hexanone and Xu et al. (2022) used 2-Hexanone.



**Table S6.** Fractional signal contributions for Fig. 3 with  $\text{H}_3\text{O}^+$  in the top half and  $\text{NH}_4^+$  in the bottom half.

| $\text{H}_3\text{O}^+$ ionization                                 | 2-hexanone  | trans-2-hexen-1-ol | 2-methyl-3-butene-2-ol | trans-2-hexenal | beta-cyclocitral |
|-------------------------------------------------------------------|-------------|--------------------|------------------------|-----------------|------------------|
| $\text{A} \cdot \text{H}^+$                                       | 0.67        | 0.00               | 0.19                   | 0.44            | 0.58             |
| $\text{A} \cdot \text{H}^+ \cdot \text{H}_2\text{O}$              | 0.13        | 0.78               | 0.77                   | 0.47            | <i>n.o.</i>      |
| $\text{A} \cdot \text{H}^+ \cdot \text{H}_2\text{O}, \text{H}_2$  | <i>n.o.</i> | 0.09               | 0.03                   | <i>n.o.</i>     | <i>n.o.</i>      |
| $\text{A} \cdot \text{H}^+ \cdot \text{H}_2\text{O}, \text{CH}_4$ | <i>n.o.</i> | 0.06               | <i>n.o.</i>            | <i>n.o.</i>     | <i>n.o.</i>      |
| $\text{A} \cdot \text{H}^+ \cdot \text{H}_2$                      | <i>n.o.</i> | 0.06               | <i>n.o.</i>            | <i>n.o.</i>     | <i>n.o.</i>      |
| $\text{A} \cdot \text{H}^+ \cdot \text{H}_2\text{CO}$             | <i>n.o.</i> | <i>n.o.</i>        | <i>n.o.</i>            | 0.09            | 0.12             |
| $\text{A} \cdot \text{H}^+ \cdot \text{C}_x\text{H}_{2x}\text{O}$ | <i>n.o.</i> | <i>n.o.</i>        | <i>n.o.</i>            | <i>n.o.</i>     | 0.29             |
| $\text{A} \cdot \text{H}^+ \cdot \text{H}_2\text{O}$              | 0.20        | <i>n.o.</i>        | <i>n.o.</i>            | <i>n.o.</i>     | <i>n.o.</i>      |
| $\text{NH}_4^+$ ionization                                        | -           | -                  | -                      | -               | -                |
| $\text{A} \cdot \text{NH}_4^+$                                    | 0.95        | 0.66               | 0.31                   | 0.95            | 0.94             |
| $\text{A} \cdot \text{NH}_4^+ \cdot \text{H}_2\text{O}$           | <i>n.o.</i> | 0.08               | 0.68                   | <i>n.o.</i>     | <i>n.o.</i>      |
| $\text{A} \cdot \text{NH}_4^+ \cdot \text{H}_2$                   | <i>n.o.</i> | 0.21               | 0.03                   | <i>n.o.</i>     | <i>n.o.</i>      |
| $\text{A} \cdot \text{NH}_4^+ \cdot \text{H}_2\text{CO}$          | <i>n.o.</i> | <i>n.o.</i>        | <i>n.o.</i>            | <i>n.o.</i>     | 0.01             |
| $\text{A} \cdot \text{NH}_4^+ \cdot \text{CH}_4$                  | <i>n.o.</i> | 0.02               | <i>n.o.</i>            | <i>n.o.</i>     | <i>n.o.</i>      |
| $\text{A} \cdot \text{H}^+$                                       | <i>n.o.</i> | <i>n.o.</i>        | <i>n.o.</i>            | <i>n.o.</i>     | 0.02             |
| $\text{A} \cdot \text{NH}_4^+ \cdot \text{NH}_3$                  | 0.02        | 0.01               | 0.00                   | 0.02            | 0.01             |
| $\text{A} \cdot \text{NH}_4^+ \cdot \text{H}_2\text{O}$           | 0.03        | 0.02               | 0.01                   | 0.03            | 0.01             |

Values in the table are the fractional contributions of various fragments, clusters, or the molecular ions. If a fragment or cluster is not observed for an analyte is it noted as *n.o.* (not observed).

**Table S7.** Vapor pressure estimates of potential biogenic ROC analytes at 25°C.<sup>a</sup>

| Analyte<br><i>MCM name</i> | Formula                                         | Vapor Pressure<br>$\mu\text{g m}^{-3}$ | Vapor Pressure<br>Pa | Method                             |
|----------------------------|-------------------------------------------------|----------------------------------------|----------------------|------------------------------------|
| LIMCOOH                    | C <sub>10</sub> H <sub>18</sub> O <sub>3</sub>  | 4.40E+2                                | 0.00586              | Modified Grain method              |
| LIMAOH                     | C <sub>10</sub> H <sub>18</sub> O <sub>2</sub>  | 3.55E+3                                | 0.0517               | Modified Grain method              |
| LIMBCO                     | C <sub>10</sub> H <sub>16</sub> O <sub>2</sub>  | 7.47E+3                                | 0.11                 | Modified Grain method              |
| LIMONONIC                  | C <sub>10</sub> H <sub>16</sub> O <sub>3</sub>  | 8.77E+3                                | 0.118                | Modified Grain method              |
| APINBCO                    | C <sub>10</sub> H <sub>16</sub> O <sub>2</sub>  | 1.76E+4                                | 0.26                 | Modified Grain method              |
| PINAL                      | C <sub>10</sub> H <sub>16</sub> O <sub>2</sub>  | 3.62E+5                                | 5.34                 | Modified Grain method              |
| PINONIC                    | C <sub>10</sub> H <sub>16</sub> O <sub>3</sub>  | 6.15E+3                                | 0.0828               | Modified Grain method              |
| C109OH                     | C <sub>10</sub> H <sub>16</sub> O <sub>3</sub>  | 4.66E+2                                | 0.00627              | Modified Grain method              |
| C107OH                     | C <sub>10</sub> H <sub>16</sub> O <sub>3</sub>  | 1.99E+3                                | 0.0268               | Modified Grain method              |
| HCO5                       | C <sub>5</sub> H <sub>8</sub> O <sub>2</sub>    | 2.07E+6                                | 51.2                 | Mean VP of Antoine & Grain methods |
| LIMALNO3                   | C <sub>10</sub> H <sub>17</sub> NO <sub>6</sub> | 1.16E+1                                | 0.000116             | Modified Grain method              |
| NLIMALOH                   | C <sub>10</sub> H <sub>17</sub> NO <sub>6</sub> | 2.32E+1                                | 0.000233             | Modified Grain method              |
| MBOANO3                    | C <sub>5</sub> H <sub>11</sub> NO <sub>5</sub>  | 7.79E+3                                | 0.117                | Modified Grain method              |

<sup>a</sup> Estimated using EPI Suite (US EPA).

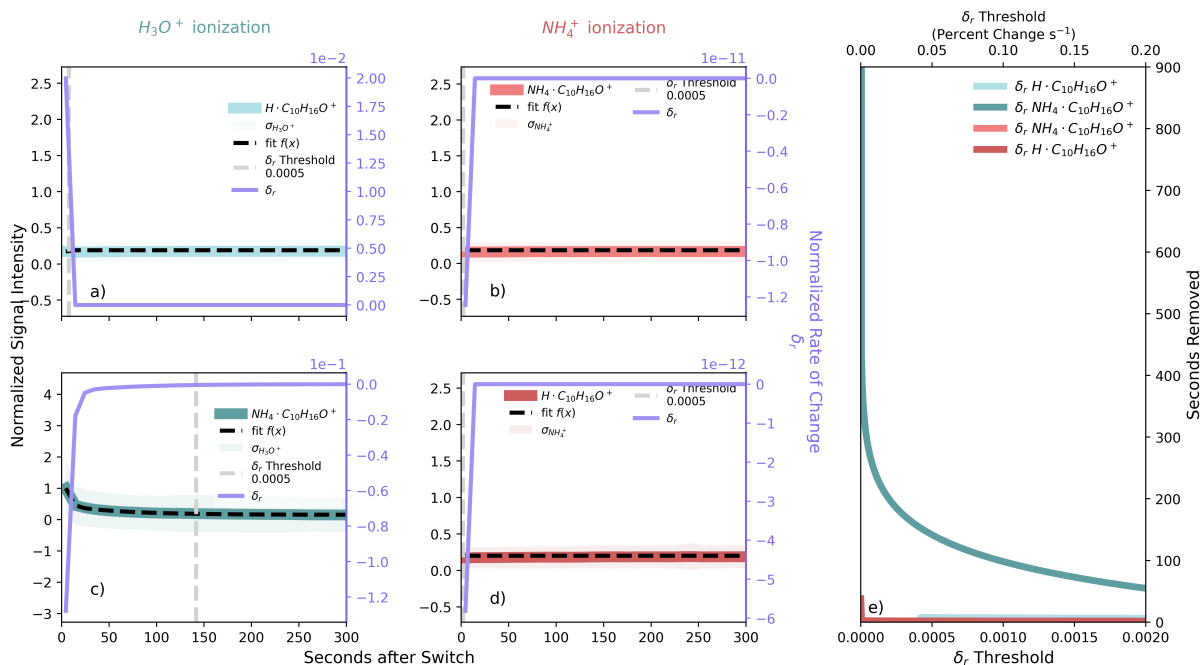

**Figure S3.** Ion signal after a reagent-ion switch for  $H_3O^+$  (a & c) and  $NH_4^+$  (b & d) to the  $C_{10}H_{16}O \cdot H^+$  (a & d) and  $C_{10}H_{16}O \cdot NH_4^+$  (b & c), in the MEFO observations. We grouped ion signals by the time after a switch and normalized the mean of each group by the maximum, and normalized means were fit with a bi-exponential function. The derivative of the fit ( $\delta_n$ ) is displayed on the right axes for (a-d) and used as a metric to filter reagent-ion hysteresis. (e) The number of seconds removed after a switch as a function of  $\delta_n$  threshold for various ions.

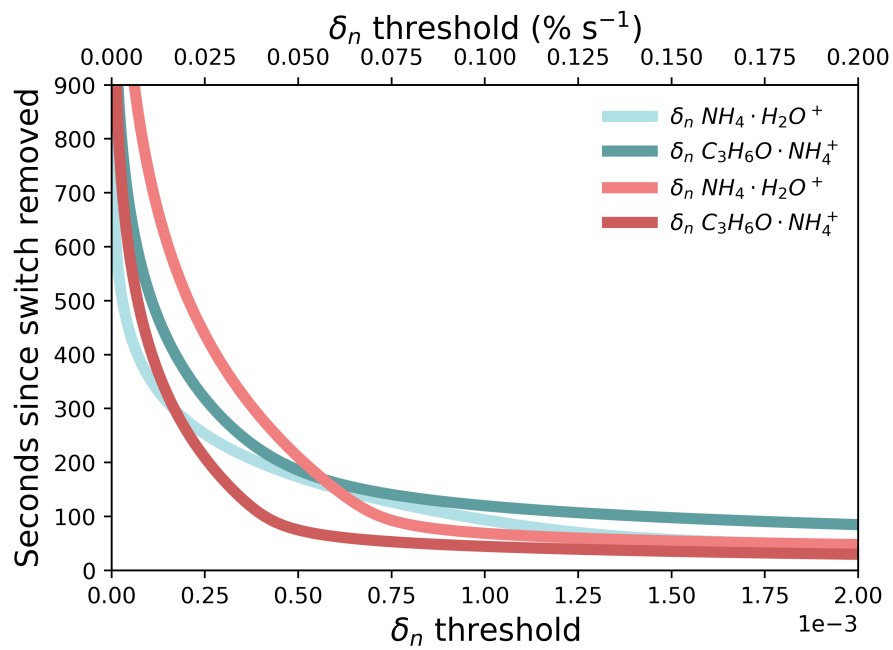

**Figure S4.** The number of seconds removed after a switch as a function of  $\delta_n$  threshold for various ions, in the MEFO observations.

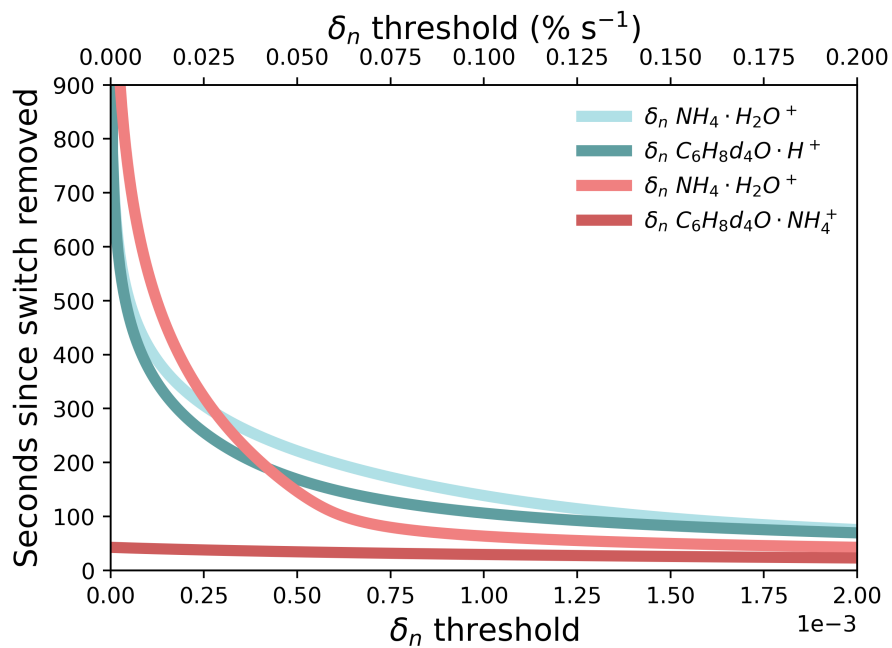

**Figure S5.** The number of seconds removed after a switch as a function of  $\delta_n$  threshold for various ions, in the ARTofMELT observations.

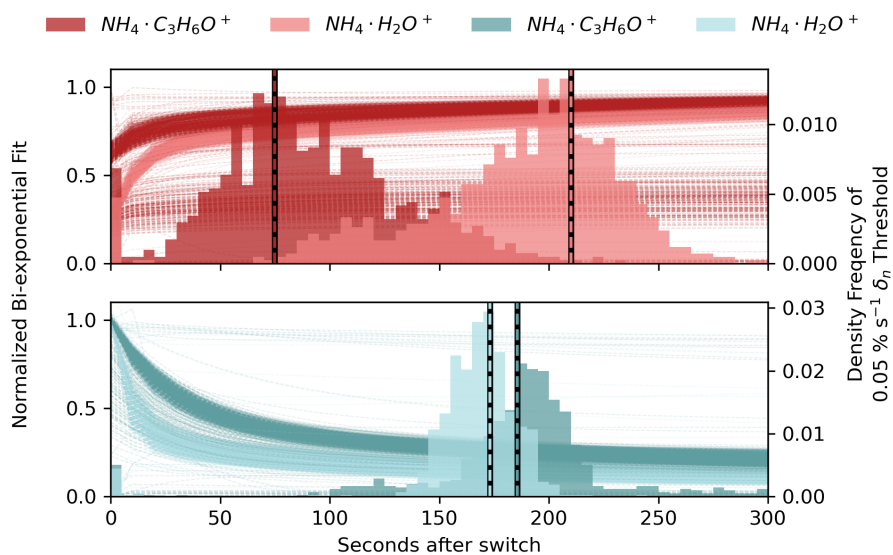

**Figure S6.** Traces of bi-exponential fit for individual switches with  $\text{NH}_4^+$  ionization (top) and  $\text{H}_3\text{O}^+$  ionization (bottom) as well as a histogram of the time at which a  $0.05\% \text{ s}^{-1}$  change threshold is reached across individual switches. Dashed lines with black background show the cutoff from the average analysis used in Sect. 3.4. Data is from the MEFO.

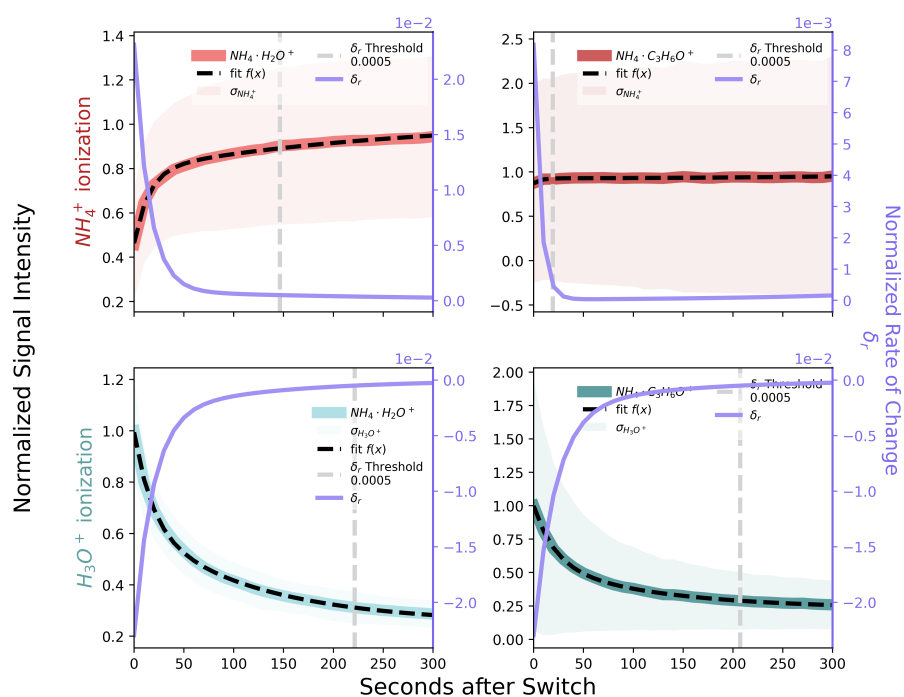

**Figure S7.** Ion signal after a reagent-ion switch for  $\text{NH}_4^+$  (top, orange) and  $\text{H}_3\text{O}^+$  (bottom, blue) in the ARTofMELT data, showing  $\text{NH}_4 \cdot \text{H}_2\text{O}^+$  ions (left) and  $\text{C}_3\text{H}_6\text{O} \cdot \text{NH}_4^+$  (right) ambient analyte ions. We grouped ion signals by the time after a switch and normalized the mean of each group by the maximum, and normalized means were fit with a bi-exponential function. The derivative of the fit ( $\delta_n$ ) is displayed on the right axes (purple traces) and is used as a metric to filter reagent-ion hysteresis.

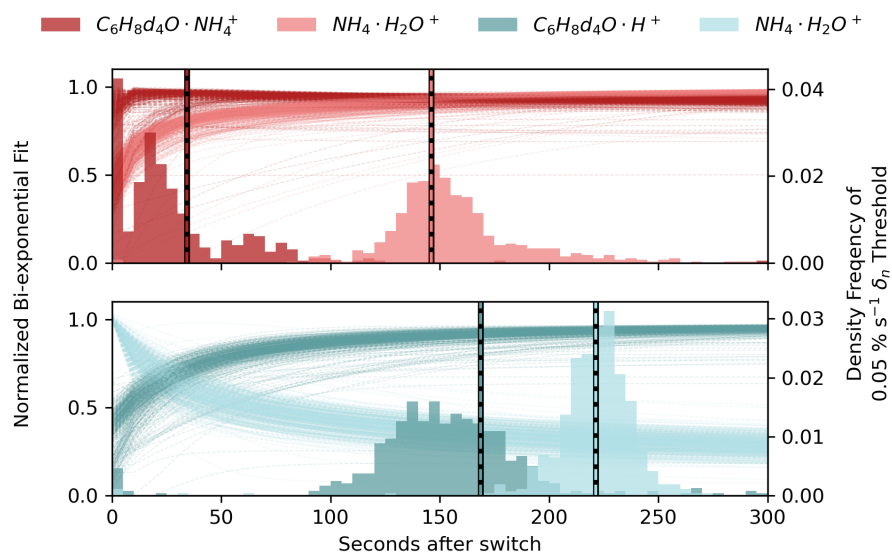

**Figure S8.** Traces of bi-exponential fit for individual switches with  $\text{NH}_4^+$  ionization (top) and  $\text{H}_3\text{O}^+$  ionization (bottom) as well as a histogram of the time at which a  $0.05\% \text{ s}^{-1}$  change threshold is reached across individual switches. Dashed lines with black background show the cutoff from the average analysis used in Sect. 3.4. Data is from a 2-week period of the ARTofMELT expedition.



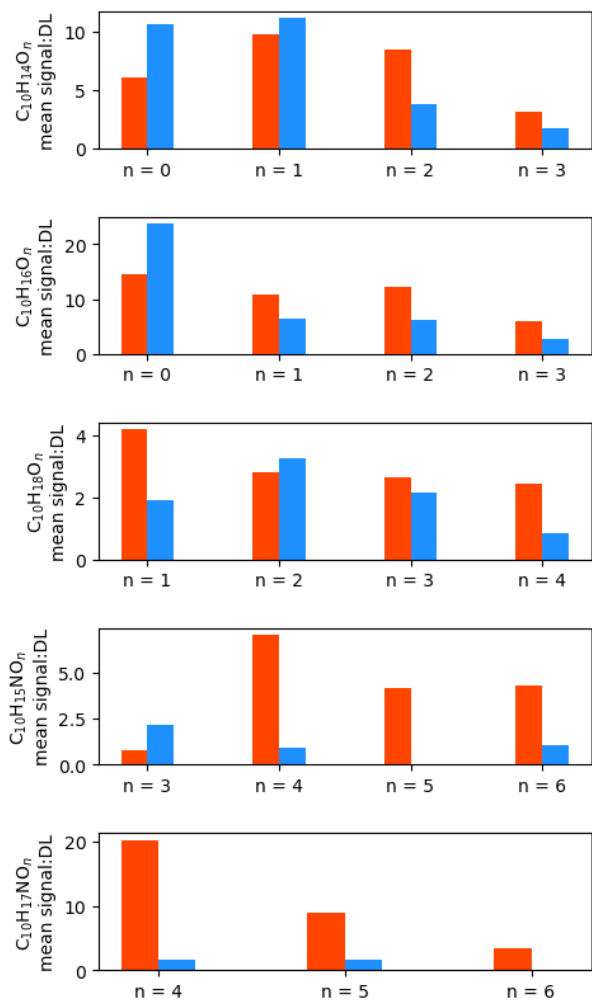

**Figure S9.** Bar chart comparison of the signal-to-DL ratio for various selected ions from Fig. 7 of the main text. Ions detected with  $\text{NH}_4^+$  are displayed as orange, and ions detected with  $\text{H}_3\text{O}^+$  are displayed as blue.

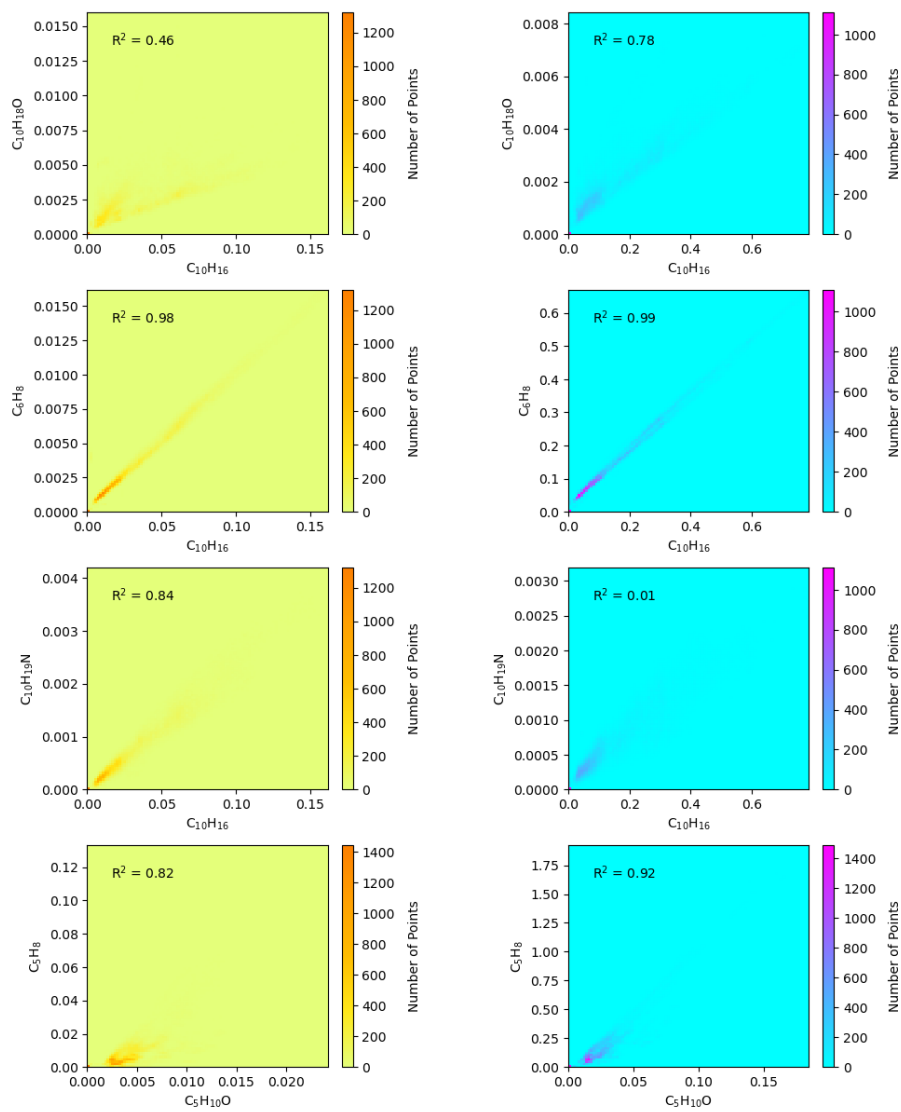

**Figure S10.** 2D-histograms of ion signals for a selection of ions detected by  $\text{NH}_4^+$  (orange/yellow, left) and  $\text{H}_3\text{O}^+$  (blue/purple, right). Color bars show frequency per bin for the 100 x100 bin grid. Signals for the ions are in counts extraction<sup>-1</sup> at 25 kHz extraction frequency.

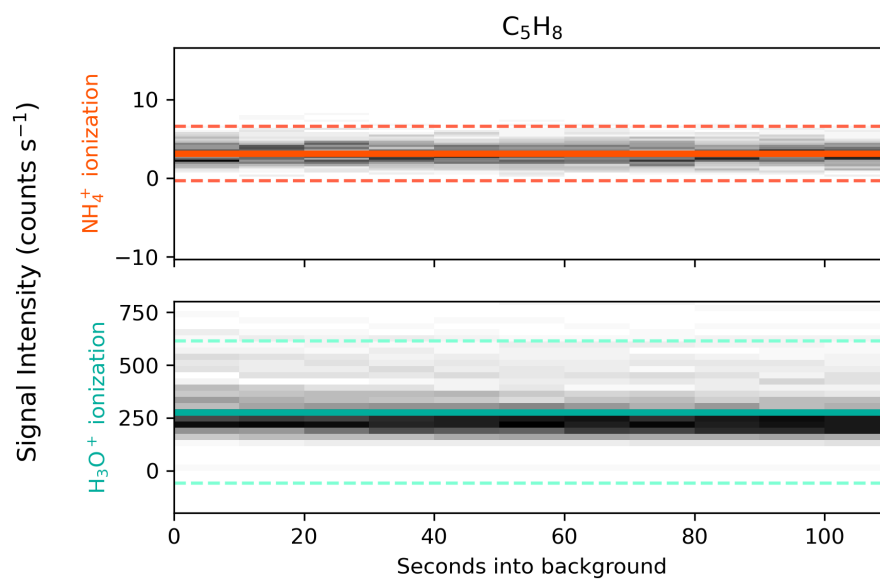

**Figure S11.** 2D-histograms of campaign zero periods for the  $C_5H_8$  ion detected with  $NH_4^+$  (orange, top) and  $H_3O^+$  (blue, bottom). Solid horizontal lines represent mean signal during zero periods and dashed lines represent  $3\sigma$  deviation from the mean.

**Table S8.** Potential structures and literature precedent for organic nitrate peaks.

| Chemical Formula                                              | Name in MCM <sup>a</sup>                                           | Reported in Fry et al. (2013)? | Potential Assignment                                                                                                                                       |
|---------------------------------------------------------------|--------------------------------------------------------------------|--------------------------------|------------------------------------------------------------------------------------------------------------------------------------------------------------|
| C <sub>5</sub> H <sub>9</sub> NO <sub>5</sub>                 | NMBOBCO<br>C4MCONO3OH                                              | no                             | 232-MBO nitrate/ Isoprene nitrate                                                                                                                          |
| C <sub>5</sub> H <sub>11</sub> NO <sub>5</sub>                | MBOANO3                                                            | no                             | 232-MBO nitrate                                                                                                                                            |
| C <sub>10</sub> H <sub>15</sub> NO <sub>3</sub>               |                                                                    | no                             | Dehydration fragment of C <sub>10</sub> H <sub>17</sub> NO <sub>4</sub>                                                                                    |
| C <sub>10</sub> H <sub>15</sub> NO <sub>4</sub>               | NC101CO<br>NC91CHO                                                 | yes (night)                    | Terpene nitrate (carbonyl)                                                                                                                                 |
| C <sub>10</sub> H <sub>15</sub> NO <sub>5</sub>               | PINALNO3                                                           | no                             | Fragment from LIMALNO3?<br>Faxon et al. (2018) speculate that it could be a fragment of dimers.<br>Oxidation of primary emissions of terpenoid oxygenates. |
| C <sub>10</sub> H <sub>15</sub> NO <sub>6</sub>               | C10PAN2<br>C923PAN<br>C918PAN<br>C108NO3                           | no                             | Terpene nitrate (PAN/carbonyl nitrate)                                                                                                                     |
| C <sub>10</sub> H <sub>17</sub> NO <sub>4</sub>               | APINCNO3<br>BPINBNO3<br>LIMANO3<br>LIMCNO3<br>APINANO3<br>BPINANO3 | yes (day and night)            | Terpene nitrate (alcohol)                                                                                                                                  |
| C <sub>10</sub> H <sub>17</sub> NO <sub>5</sub>               | NBPINAOOH<br>NAPINBOOH<br>NLIMOOH                                  | yes (night)                    | Terpene nitrate (hydroperoxy)                                                                                                                              |
| C <sub>10</sub> H <sub>17</sub> NO <sub>6</sub>               | LIMALNO3<br>NLIMALOH                                               | no                             | Limonene nitrate                                                                                                                                           |
| C <sub>10</sub> H <sub>16</sub> N <sub>2</sub> O <sub>6</sub> |                                                                    | no                             | Proposed as $\alpha$ -pinene oxidation product (Bates et al., 2022)                                                                                        |

<sup>a</sup>Exploration of the MCM is non-exhaustive (Saunders et al., 2003; Jenkin et al., 2015).

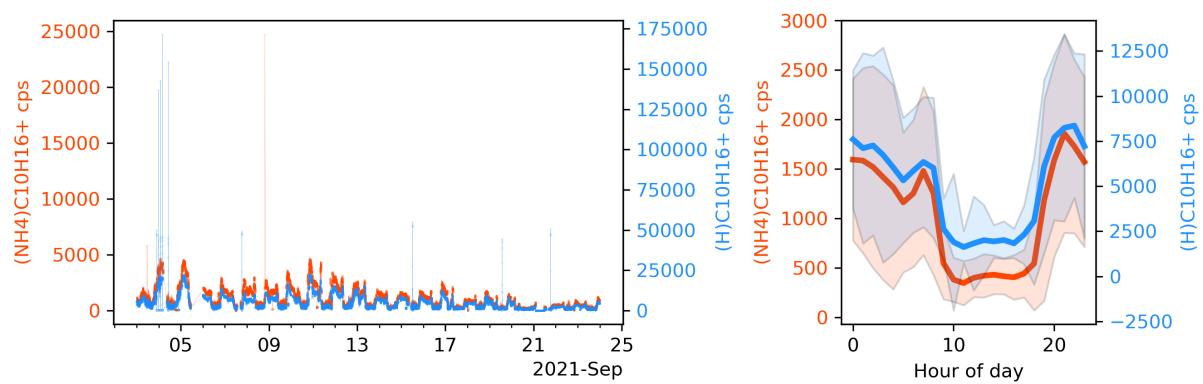

**Figure S12.** Time-series of ion signals of  $\text{NH}_4^+ \cdot \text{C}_{10}\text{H}_{16}$  detected by  $\text{NH}_4^+$  (orange) and  $\text{H}^+ \cdot \text{C}_{10}\text{H}_{16}$   $\text{H}_3\text{O}^+$  (blue). Diurnal averages are included in the right plot.

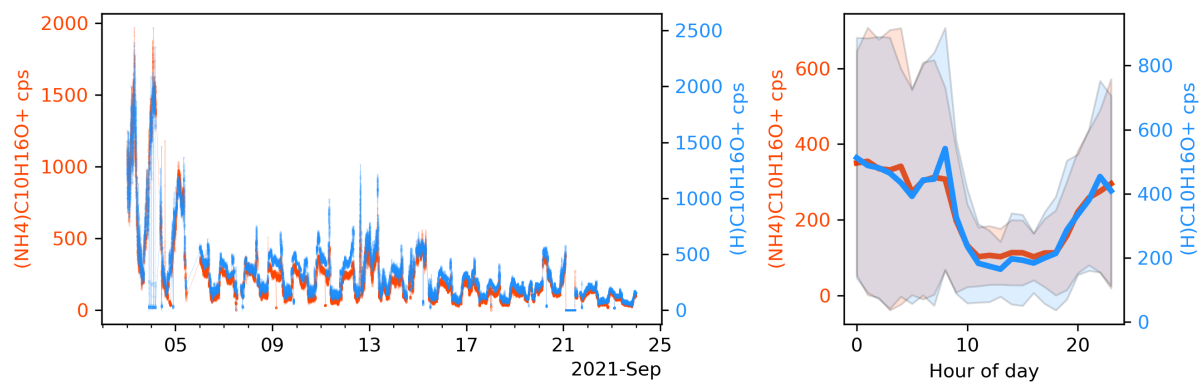

**Figure S13.** Time-series of ion signals of  $\text{NH}_4^+ \cdot \text{C}_{10}\text{H}_{16}\text{O}$  detected by  $\text{NH}_4^+$  (orange) and  $\text{H}^+ \cdot \text{C}_{10}\text{H}_{16}\text{O}$   $\text{H}_3\text{O}^+$  (blue). Diurnal averages are included in the right plot.

## References

- Bates, K. H., Burke, G. J. P., Cope, J. D., and Nguyen, T. B.: Secondary organic aerosol and organic nitrogen yields from the nitrate radical (NO<sub>3</sub>) oxidation of alpha-pinene from various RO<sub>2</sub> fates, *Atmospheric Chemistry and Physics*, 22, 1467–1482, <https://doi.org/10.5194/acp-22-1467-2022>, 2022.
- 5 Edward P. Hunter and Sharon G. Lias: Proton Affinity Evaluation, in: NIST Chemistry WebBook, NIST Standard Reference Database Number 69, Eds. P.J. Linstrom and W.G. Mallard, National Institute of Standards and Technology, Gaithersburg MD, 20899, <https://doi.org/https://doi.org/10.18434/T4D303>.
- Faxon, C., Hammes, J., Le Breton, M., Pathak, R. K., and Hallquist, M.: Characterization of organic nitrate constituents of secondary organic aerosol (SOA) from nitrate-radical-initiated oxidation of limonene using high-resolution chemical ionization mass spectrometry, *Atmospheric Chemistry and Physics*, 18, 5467–5481, <https://doi.org/10.5194/acp-18-5467-2018>, 2018.
- 10 Fry, J. L., Draper, D. C., Zarzana, K. J., Campuzano-Jost, P., Day, D. A., Jimenez, J. L., Brown, S. S., Cohen, R. C., Kaser, L., Hansel, A., Cappellin, L., Karl, T., Hodzic Roux, A., Turnipseed, A., Cantrell, C., Lefer, B. L., and Grossberg, N.: Observations of gas- and aerosol-phase organic nitrates at BEACHON-RoMBAS 2011, *Atmospheric Chemistry and Physics*, 13, 8585–8605, <https://doi.org/10.5194/acp-13-8585-2013>, 2013.
- 15 Jenkin, M. E., Young, J. C., and Rickard, A. R.: The MCM v3.3.1 degradation scheme for isoprene, *Atmospheric Chemistry and Physics*, 15, 11 433–11 459, <https://doi.org/10.5194/acp-15-11433-2015>, 2015.
- Michael M. Meot-Ner (Mautner) and Sharon G. Lias: Binding Energies Between Ions and Molecules, and The Thermochemistry of Cluster Ions, in: NIST Chemistry WebBook, NIST Standard Reference Database Number 69, Eds. P.J. Linstrom and W.G. Mallard, National Institute of Standards and Technology, Gaithersburg MD, 20899, <https://doi.org/https://doi.org/10.18434/T4D303>.
- 20 Saunders, S. M., Jenkin, M. E., Derwent, R. G., and Pilling, M. J.: Protocol for the development of the Master Chemical Mechanism, MCM v3 (Part A): tropospheric degradation of non-aromatic volatile organic compounds, *Atmospheric Chemistry and Physics*, 3, 161–180, <https://doi.org/10.5194/acp-3-161-2003>, 2003.
- US EPA: Estimations Programs Interface Suite for Microsoft Windows, <https://www.epa.gov/tsca-screening-tools/epi-suitetm-estimation-program-interface>.
- 25 Xu, L., Coggon, M. M., Stockwell, C. E., Gilman, J. B., Robinson, M. A., Breitenlechner, M., Lamplugh, A., Crounse, J. D., Wennberg, P. O., Neuman, J. A., Novak, G. A., Veres, P. R., Brown, S. S., and Warneke, C.: Chemical ionization mass spectrometry utilizing ammonium ions (NH<sub>4</sub><sup>+</sup> CIMS) for measurements of organic compounds in the atmosphere, *Atmospheric Measurement Techniques*, 15, 7353–7373, <https://doi.org/10.5194/amt-15-7353-2022>, 2022.
